# Supplementary material for: VOLARE: visual analysis of disease-associated microbiome-immune system interplay
Source: BMC Bioinformatics. 2019 Aug 20;20:432. doi: 10.1186/s12859-019-3021-0 (PMC6701114; doi:10.1186/s12859-019-3021-0)
Supplement: Supplementary file 4 — Underlying data, case study 2. (CSV 25 kb) [file 12859_2019_3021_MOESM4_ESM.csv]

pid	study_group	tnfa	il_6	il_10	ifng	il_22	il_17	il_1b	Bacteria/Firmicutes/Clostridia/Clostridiales/Family-XI-Incertae-Sedis/Finegoldia	Bacteria/Firmicutes/Clostridia/Clostridiales/Lachnospiraceae	Bacteria/Bacteroidetes/Bacteroidia/Bacteroidales/Prevotellaceae/Prevotella	Bacteria/Bacteroidetes/Bacteroidia/Bacteroidales/Bacteroidaceae/Bacteroides	Bacteria/Firmicutes/Clostridia/Clostridiales/Lachnospiraceae/Anaerostipes	Bacteria/Firmicutes/Clostridia/Clostridiales/Family-XI-Incertae-Sedis/Peptoniphilus	Bacteria/Firmicutes/Clostridia/Clostridiales/Lachnospiraceae/Blautia	Bacteria/Firmicutes/Clostridia/Clostridiales/Ruminococcaceae/Faecalibacterium	Bacteria/Firmicutes/Clostridia/Clostridiales/Ruminococcaceae	Bacteria/Firmicutes/Clostridia/Clostridiales/Family-XI-Incertae-Sedis/Anaerococcus	Bacteria/Proteobacteria/Gammaproteobacteria/Enterobacteriales/Enterobacteriaceae/Escherichia-Shigella	Bacteria/Firmicutes/Clostridia/Clostridiales/Lachnospiraceae/Pseudobutyrivibrio	Bacteria/Proteobacteria/Epsilonproteobacteria/Campylobacterales/Campylobacteraceae/Campylobacter	Bacteria/Firmicutes/Clostridia/Clostridiales/Lachnospiraceae/Coprococcus	Bacteria/Firmicutes/Clostridia/Clostridiales/Ruminococcaceae/Subdoligranulum	Bacteria/Firmicutes/Clostridia/Clostridiales/Lachnospiraceae/Roseburia	Bacteria/Firmicutes/Clostridia/Clostridiales/Ruminococcaceae/Ruminococcus	Bacteria/Firmicutes/Clostridia/Clostridiales/Lachnospiraceae/Dorea	Bacteria/Firmicutes/Negativicutes/Selenomonadales/Veillonellaceae/Dialister	Bacteria/Actinobacteria/Actinobacteria/Bifidobacteriales/Bifidobacteriaceae/Bifidobacterium	Bacteria/Actinobacteria/Actinobacteria/Corynebacteriales/Corynebacteriaceae/Corynebacterium	Bacteria/Bacteroidetes/Bacteroidia/Bacteroidales/Porphyromonadaceae/Porphyromonas	Bacteria/Firmicutes/Bacilli/Lactobacillales/Streptococcaceae/Streptococcus	Bacteria/Proteobacteria/Gammaproteobacteria/Aeromonadales/Succinivibrionaceae/Succinivibrio	Bacteria/Firmicutes/Clostridia/Clostridiales/Christensenellaceae	Bacteria/Bacteroidetes/Bacteroidia/Bacteroidales/S24-7	Bacteria/Firmicutes/Clostridia/Clostridiales	Bacteria/Firmicutes/Clostridia/Clostridiales/Family-XIII-Incertae-Sedis	Bacteria/Bacteroidetes/Bacteroidia/Bacteroidales/Rikenellaceae/Alistipes	Bacteria/Bacteroidetes/Bacteroidia/Bacteroidales/Porphyromonadaceae/Parabacteroides	Bacteria/Firmicutes/Clostridia/Clostridiales/Peptostreptococcaceae	Bacteria/Firmicutes/Clostridia/Clostridiales/Family-XI-Incertae-Sedis/Murdochiella	Bacteria/Firmicutes/Clostridia/Clostridiales/Clostridiaceae/Clostridium	Bacteria/Proteobacteria/Betaproteobacteria/Burkholderiales/Alcaligenaceae/Sutterella	Unclassified	Bacteria/Firmicutes/Negativicutes/Selenomonadales/Acidaminococcaceae/Phascolarctobacterium	Bacteria/Proteobacteria/Deltaproteobacteria/Desulfovibrionales/Desulfovibrionaceae/Desulfovibrio	Bacteria/Firmicutes/Negativicutes/Selenomonadales/Veillonellaceae/Veillonella	Bacteria/Proteobacteria/Gammaproteobacteria/Enterobacteriales/Enterobacteriaceae	Bacteria/Firmicutes/Negativicutes/Selenomonadales/Veillonellaceae/Megasphaera	Bacteria/Proteobacteria/Alphaproteobacteria/Rhizobiales/Bradyrhizobiaceae/Bradyrhizobium
1	UC	0.000109392	0	0	0.025430319	0	0.002048022	0	0.01425	0.08622	0.00052	0.10341	0.26812	0.00353	0.14388	0.18123	0.05112	0.00348	2.00E-05	0.01365	2.00E-04	0.02571	0.00399	0.0214	1.00E-05	0.00535	0.00013	0.00038	0.00247	0.00031	0.00215	0.00036	0.00047	0.00057	0.00801	0.00048	0.00532	0.0094	0.00053	1.00E-05	0.00045	1.00E-05	0.00065	0.01197	0.00037	0.00058	0	0	0.00054
2	CD	0.008639702	7.30E-06	0.005154566	3.936723708	0.039808	0.011859852	0	0.12909	0.10513	0.09632	0.02695	0.14184	0.02153	0.10456	0.09117	0.04026	0.01941	0.00012	0.01454	0.00311	0.01446	0.01933	0.00805	0.00477	0.01032	0.00176	0.00025	0.00311	0.0048	0.00108	8.00E-04	0.00538	0.00291	0.00367	0.00434	0.00577	0.00429	0.00066	9.00E-05	0.00162	0.01978	0.00197	0.01613	0.03166	0.00042	1.00E-05	1.00E-05	0.00136
9	SpA	0.04689793	0	0	18.27600026	0	0.021772134	0	0.27127	0.04232	0.02862	0.0109	0.00507	0.09792	0.00798	0.00523	0.02795	0.06838	0.01128	0.00306	0.11089	0.00253	0.00183	0.0035	0.00262	0.00114	0.00864	0.00473	0.02656	0.044	0.01672	0.00011	0.00365	0.01136	0.00295	0.02571	0.00205	0.00398	0.00238	0.02888	0.00396	0.00068	0.00541	0.00059	0.00093	0.00011	0.00072	0.00557	0.00512
10	SpA	0.001750618	0	0	0	0	0	0	0.01785	0.12724	0.03123	0.02122	0.00234	0.00737	0.05048	0.06941	0.15106	0.00121	0.00026	0.0089	0.01143	0.02213	0.05122	0.01146	0.02781	0.02459	0.00307	3.00E-04	0.00031	0.00226	0.00121	0.04184	0.06326	0.00096	0.01712	0.0089	0.00441	0.00712	0.00015	0.01274	2.00E-05	0.00273	0.0104	0.00868	0.00383	0	0.006	0.04397	1.00E-05
11	HC	0.000185584	0	0	0.391155241	0	0	0	0.14011	0.1018	0.03061	0.05974	0.01151	0.04571	0.02194	0.04395	0.03106	0.06293	0.1376	0.00251	0.00901	0.01083	0.02012	0.01385	0.00513	0.01362	0.0041	0.00114	0.01573	0.00205	0.0289	0.00593	0.00336	0.01368	0.00427	0.00234	0.00063	0.00205	0.00239	0.00325	0.00222	0.00861	0.00199	0.00274	0.00063	0.00849	0.00348	0.00268	0.01003
14	HC	0.000328374	0	0	0.009781154	0.000628876	0	0	0.31514	0.02378	0.06296	0.03438	0.07168	0.18296	0.00679	0.0228	0.00758	0.11177	7.00E-05	0	0.00867	0.0074	0.00065	0.0039	2.00E-05	0.03014	0.04385	0.00044	0.00031	0.02697	0.00503	1.00E-05	5.00E-05	4.00E-05	0.00111	0.00544	1.00E-05	0.00139	0.00011	0.00162	0	0.0011	0.00421	2.00E-05	0	0	0	2.00E-05	0.00058
19	HC	0.003431429	0.014665634	0.016024	0.037851168	0.118394	0	0	0.13335	0.1468	0.11475	0.0502	0.00717	0.04572	0.03003	0.03989	0.04841	0.03227	0.00807	0.02039	0.00941	9.00E-04	0.01009	0.0065	0.00314	0.02017	0.00695	0.03474	0.00269	0.01367	0.01681	0.00986	0.00134	0.0139	0.00583	0.00381	0.00224	0.00202	0.01188	0.00291	0.0139	0.00493	0.00381	0.00112	0.00112	0.00224	9.00E-04	9.00E-04	0.00896
21	HC	0.000315326	0	0.003453913	0.060329921	0	0	5.10E-07	0.08568	0.10032	0.18851	0.04794	0.09654	0.0262	0.05012	0.04669	0.0819	0.01753	0.01666	0.00248	0.00086	0.09162	0.00749	0.01537	0.00564	0.00603	0.00881	0.00228	0.00177	2.00E-04	0.00398	0	0.00801	0.00066	0.00296	0.00234	0.00869	0.00143	0.00096	0	7.00E-05	0.00036	0.0015	0.00414	0	4.00E-05	0.00045	0	0.00255
30	CD	0.034852782	0.003961779	0.001462038	3.656521784	0.019434632	0.005027329	0	0.21844	0.09076	0.0207	0.02945	0.01346	0.03986	0.03258	0.04265	0.07851	0.03405	0.00143	0.00852	0.0095	0.00698	0.01486	0.00671	0.01263	0.01275	0.00177	0.00151	0.03477	0.00739	0.00162	0.02998	0.01942	0.0279	0.00641	0.01048	0.0049	0.00471	0.00177	0.01203	0.00136	0.00011	0.01127	0.00109	0.00633	0.00034	0.002	0.01591	0.02425
31	CD	0.232675848	0.000390736	0.106280035	158.0561906	3.09E-05	0.467653364	8.56E-06	0.22541	0.08869	0.0108	0.03082	0.01658	0.06511	0.03166	0.03651	0.01214	0.21214	0.00184	0.0139	0.00955	0.00255	0.01445	0.00272	0.00013	0.00636	0.00352	0.01403	0.06277	0.00473	0.01947	4.00E-05	0.00033	0.01206	0.00712	0.00071	0.00121	0.0041	0.00054	0	8.00E-05	0.00431	0.00335	0.00138	0.00134	0.00042	0.00042	0.00029	0.00423
34	CD	8.05E-07	8.23E-06	0.000819022	0.004862701	0	0	0	0.21934	0.0603	0.01485	0.02188	0.00351	0.14532	0.00363	0.02891	0.01292	0.14521	0.00147	0.00329	0.02913	0.00011	0.0017	0.0051	0	0	0.00249	0	0.01564	0.08706	0.03401	0	0	0.00329	0.00068	0	0	0.00023	0	0.00487	0	0	0.00057	0.00034	0.00102	0.00034	0	0	0.028
35	SpA	0.001364098	0	1.686841885	1.686841885	0.000216294	0	0.000477	0.01715	0.11864	0.0029	0.03929	0.44776	0.01128	0.05494	0.00059	0.07085	0.02473	0	0.00702	0	0.00283	0.00509	0.01517	0.00299	0.00688	0.00594	0.00013	0.01038	0.00024	0.00665	0.00037	0.00035	0.00099	0.00323	0.00164	0.04246	0.01589	0.02622	1.00E-05	0.00211	0	0.00178	1.00E-05	0.00017	0.00033	6.00E-05	3.00E-05	0.00059
39	HC	0	0	0	0.000882941	0.172211	0	0	0.18236	0.10585	0.01962	0.02754	0.01674	0.05617	0.01368	0.0369	0.09829	0.03024	0.00198	0.009	0.018	0.0054	0.0063	0.00414	0.00252	0.0063	0.00432	0.00432	0.03366	0.01512	0.00324	0.00198	0.00198	0.0405	0.00324	0.00972	0.01674	0.02682	0.0063	0.00882	0	0.00162	0.0045	0	0.009	0.00108	0.00036	0.00072	0.02646
41	HC	1.38E-05	0	0.001604045	0.002675775	0	0	0	0.14727	0.17002	0.00285	0.05928	0.01193	0.03043	0.20318	0.05706	0.02867	0.06482	0.00067	0.01225	0.03483	0.01773	0.01527	0.01431	0.02145	0.017	0.00495	0.00165	0.00134	0.00141	3.00E-04	0.00022	0.00328	0.00024	0.00774	0.00466	0.00716	0.00277	0.00451	0.01262	6.00E-05	4.00E-05	0.00175	0.00012	4.00E-05	0.00013	1.00E-04	0.00029	0.00102
51	SpA	0.051365248	0	0	3.512652771	0.174699724	0	0	0.00568	0.13748	0.00784	0.07036	0.04811	0.00291	0.07868	0.07904	0.16037	0.00771	0.00193	0.0113	0	0.02188	0.06082	0.01427	0.05569	0.01385	1.00E-04	0.01143	0.00356	0	0.00271	0.00046	0.02518	0.00065	0.00516	0.00157	0.03436	0.03949	0.00173	0	0.00248	1.00E-04	0.00111	0.00663	0.00565	0.00291	0.00059	0.00033	0.00268
56	UC	0.000738129	0	0	0.633796634	0.069115	0.002655143	2.02E-05	0.0026	0.15331	0.01491	0.16223	0.12747	0.00075	0.18341	0.10314	0.03896	0.00088	0.00114	0.03795	2.00E-05	0.00852	0.02413	0.01119	0.01766	0.0158	0.00562	0.00615	0.001	3.00E-05	0.00193	0.00182	0.0035	0.00058	0.00879	7.00E-04	0.00493	0.00429	0.00029	0	0.00159	0.00022	0.00263	0.00039	0.0159	0.00175	0.00043	0.00021	9.00E-05
57	UC	0.000265483	0	0	0.002171731	0.069115	0	5.72E-07	0.4379	0.0548	0.03623	0.01856	0.00609	0.11988	0.01886	0.05525	0.01079	0.08025	0.03175	0.00407	0.00011	0.00236	0.01732	0.00693	0.00112	0.00656	0.00882	0.00349	0.00074	0.00697	0.00792	0.00128	0.00102	0.00035	0.00263	0.00496	0.00011	0.00158	0.00084	0.00564	0.00137	0.01644	0.00368	0.00034	3.00E-05	0.00112	0.00126	5.00E-05	9.00E-05
74	HC	0	0	0	0.000611313	0	0	0	0.25052	0.07755	0.06624	0.03391	0.01237	0.09106	0.01338	0.0237	0.04129	0.0718	0.00438	0.01175	0.01447	0.00512	0.01464	0.00927	0.00562	0.00635	0.00732	0.01365	0.02661	0.01979	0.00528	0.00618	0.00229	0.01542	0.00376	0.02425	0.00298	0.00123	0.00204	0.00346	0.00857	0.00119	0.00511	0.00271	0.00162	0.00446	0.00135	0.00051	0.01008
79	HC	1.97E-05	0	0	0.005439568	0	0	0	0.01109	0.17299	0.17208	0.06431	0.00672	0.00285	0.02371	0.07245	0.07317	0.00529	0.01303	0.0171	0.00051	0.01068	0.00936	0.0174	0.01699	0.00407	0.01537	0.0406	0.00275	1.00E-04	0.01526	0.01923	0.00499	0.00509	0.00692	0.00275	0.00488	0.00926	0.00336	0	0.01883	0.00651	0.00336	0.00519	0.00061	0.01476	0.00539	0.00112	0.00142
81	SpA	0.275647628	0.013788921	0.001286053	14.26533071	0.037637185	0.007436022	0	0.16091	0.18506	0.06174	0.02193	0.00922	0.03066	0.01193	0.0237	0.09197	0.0294	0.00451	0.01556	0.00133	0.00416	0.00903	0.01002	0.01379	0.00515	0.00736	0.016	0.03894	0.00515	0.00621	0.00579	0.00225	0.06186	0.00869	0.00439	0.0017	0.00177	0.01	0.0011	0.01253	0.00138	0.00368	0.00221	0.00129	0.00586	0.00147	0.00034	0.00074
87	HC	0.003439589	0.000409026	0.000111534	0.12510031	0.000431081	0.000609464	0	0.11259	0.09757	0.01868	0.07724	0.00893	0.09843	0.01989	0.08879	0.06925	0.03865	0.00118	0.00229	0.03665	0.01068	0.00906	0.00703	0.0026	0.01683	0.00431	0.00399	0.00083	0.03542	0.00672	0.00151	0.01236	0.00091	0.00498	0.01235	0.00697	0.01144	0.00196	0.0039	0.00105	0.00713	0.00582	0.0024	0.01019	0.00181	0.00038	0.00028	0.00056
88	CD	0.00192328	0	0.009600615	6.861619295	0.008995862	0.043181961	9.16E-06	0.22225	0.03812	0.18931	0.0087	0.00039	0.06	0.00262	0.02607	0.02863	0.13563	0.00732	0.01304	0.01478	0.00289	0.0019	0.00638	0.00599	0.00217	0.00867	0.02023	0.02643	0.00087	0.01201	0.00882	0.00163	0.00129	0.00355	0.00193	0.00114	0.00072	0.00111	0.00069	0.01129	0.00295	0.00349	0.00301	0	0.00792	0.00214	0.00027	0.00135
94	UC	0.031042904	0.000752046	0.0894792	0.847977398	0.015109	0.074854473	2.02E-05	0.07382	0.08353	0.14408	0.04039	0.01503	0.05222	0.02352	0.04843	0.03403	0.01803	0.00298	0.01735	0.14619	0.02437	0.00813	0.01066	0.01267	0.0089	0.00867	0.01527	0.00256	0.01047	0.0066	0.0063	0.0025	0.00092	0.00387	0.00519	0.00105	0.00115	0.00097	0.04508	0.00453	0.00118	0.00504	0.0036	0.00058	0.0036	0.00449	0.00124	0.00011
97	HC	0.018733272	0.012222159	0.021865	0.04764078	0	0	0	0.00123	0.09866	0.27877	0.02221	9.00E-05	0.00088	0.00559	0.06569	0.06861	0.00052	0.00784	0.04026	0.00033	0.01178	0.00784	0.02887	0.02785	0.00609	0.01742	0.04463	0.00033	2.00E-05	0.01356	0.02332	0.00225	0.00256	0.00981	0.00062	0.00062	0.00085	0.00337	0	0.01756	0.00273	0.00654	0.01126	0.00057	0.01138	0.01633	0.00256	0.00118
98	UC	0.00304797	0.031277953	0.001482	0.008189126	0.000119	0	0	0.00373	0.09585	0.26337	0.0182	0.00668	0.00156	0.00565	0.06707	0.06958	0.00064	0.00843	0.04292	0.00022	0.01127	0.00679	0.03006	0.02664	0.00802	0.01261	0.04545	0.00058	0	0.01717	0.02669	0.00186	0.00231	0.01105	0.00056	0.001	0.00103	0.00584	0	0.016	0.00237	0.0052	0.01172	8.00E-05	0.01291	0.0204	0.00173	0.00067
101	HC	0.004762734	1.57E-05	0.00467596	1.75137261	0	0.055454287	0	0.03427	0.09215	0.22115	0.01893	5.00E-04	0.0157	0.00261	0.06069	0.06635	0.03691	0.0067	0.04044	0.02914	0.01077	0.00838	0.0274	0.02888	0.00519	0.01632	0.0382	0.00048	0.00014	0.01837	0.02036	0.00163	0.00252	0.00799	0.00034	0.00143	0.00146	0.00356	0.00014	0.01127	0.00317	0.00541	0.00712	2.00E-04	0.00982	0.0143	0.0023	0.00064
118	CD	0.038166373	0.000962195	0.018135329	11.02013571	0	0.213250654	0	0.00291	0.10798	0.25643	0.01858	0.00016	0.00111	0.00561	0.07093	0.07469	0.00159	0.00633	0.04687	0.00053	0.0094	0.00569	0.02925	0.0284	0.00529	0.01683	0.04171	0.00048	0.00024	0.01411	0.02739	0.00265	0.00265	0.01064	0.00037	0.00146	0.00183	0.00503	0	0.01416	0.00352	0.00492	0.00934	0.00034	0.01032	0.01715	0.00196	0.00098
119	CD	0.000114056	0	0.005039821	0.485387582	0	0	0	0.09597	0.07004	0.12314	0.02741	0.07747	0.06942	0.03269	0.06564	0.04844	0.04427	0.0026	0.01531	0.00015	0.02321	0.01259	0.01369	0.01512	0.01921	0.00881	0.01485	0.01173	0.00456	0.00977	0.00682	0.00282	0.00118	0.00687	0.01092	0.00133	0.00226	0.00265	0.00456	0.00506	0.0013	0.00373	0.00506	0.00015	0.00699	0.00577	0.00091	0.00034
130	SpA	0.004673604	0.013768215	0.001236309	0.004286856	0.004503876	8.76E-06	0	0.0621	0.26181	0.07854	0.02661	0.00291	0.01925	0.123	0.01942	0.03078	0.03975	0.00162	0.09005	0.0021	0.00398	0.00164	0.02456	0.00912	0.00164	0.01049	0.03056	4.00E-04	0.00017	0.00627	0.00742	0.00075	0.00325	0.0067	0.00064	0.00132	0.00045	0.02471	9.00E-05	0.00823	0.00732	0.00355	0.00262	0.00072	0.00364	0.00383	0.00059	0.00072
131	UC	0.000591237	2.08E-05	0	0.306572993	0	0	9.40E-06	0.00436	0.10345	0.26254	0.02115	5.00E-04	0.00173	0.00682	0.06628	0.0705	0.00111	0.00817	0.04704	0.00012	0.01098	0.0065	0.02967	0.0333	0.00764	0.01552	0.04364	0.0022	0.00012	0.0128	0.02475	0.00284	0.00354	0.00861	0.00097	0.00082	0.00114	0.00357	0.00023	0.01713	0.00331	0.00439	0.00958	0.00056	0.00937	0.01655	0.00182	0.00073
132	CD	0.220743451	0.051014284	0.225912	7.039788049	0.004557	0.069753449	0	0.08673	0.05263	0.00429	0.13684	0.00615	0.03586	0.00419	0	0.21099	0.01164	0.02403	0.00838	0.0081	0.00028	0.00168	0.00522	9.00E-05	0	0.00233	0.00065	0.00736	0.00363	0.01686	0	0.00568	0.07406	0.00084	0.00075	0.01872	0.01211	0.01071	0	0.00233	0.00028	0.00782	0	0.01015	0.00587	0.00019	0	0.0109
135	HC	4.50E-05	0	0.003597126	0.022184845	0	0	0	0.05103	0.29617	0.00419	0.10173	0.01321	0.00967	0.04018	0.0506	0.02299	0.0101	0.00193	0	0	0.01289	0.00494	0.00956	0.00913	0.00849	0.00279	0.00258	0.02524	0.00021	0.0231	0	0	0.0174	0.00301	0	0.0145	0.00226	0.00021	0.00032	0	0	0.00269	0.00226	0.00183	0.00161	0.00011	0	0.01923
137	UC	0.007761618	0	0	0.22104278	0	0	0	0.09921	0.21219	0.01541	0.15024	0.04217	0.01142	0.07224	0.05262	0.04656	0.0295	0.00228	0.00311	0.01073	0.0158	0.00143	0.00415	0.00088	0.01536	0.02968	0.00085	0.00334	0.00044	0.01794	0.00504	0.00069	0.01497	0.0018	5.00E-05	0.00412	0.01197	0.01098	0.0055	0.00035	0.00115	0.0018	0.00023	0.00472	0.00124	5.00E-05	0.00016	0.00567
151	HC	0.000730371	0	0.000203	0	0.007194	0	0	0.35113	0.08367	0.00938	0.03047	0.01889	0.06636	0.03232	0.01405	0.03216	0.06379	0.00126	0.01541	0.00721	0.00189	0.01088	0.0073	0.0033	0.00344	0.00571	0.00215	0.05844	0.01232	0.0019	0.00078	0.00101	0.03949	0.00257	0.00839	0.00417	0.00301	0.00208	0.00647	0.00121	3.00E-04	0.00284	0.00015	0.00465	7.00E-05	0.00012	0.00015	0.0184
170	CD	0.000943171	3.41E-05	0	0.044493628	0.001317	0	9.37E-08	0.00587	0.2181	8.00E-05	0.29787	0.00319	0.00083	0.04311	0.07043	0.08462	0.00256	0.00058	0.0747	0.00022	0.04158	0	0.05599	3.00E-04	0	0.00691	0.00018	0.00025	2.00E-04	0.00068	0.00017	0.00038	0.00017	0.01019	0.00084	0	0	0.03135	0	2.00E-04	0	0.00089	0	0	0.00175	3.00E-05	2.00E-05	0.00074
177	CD	0.008315707	0	0.002220028	0.2307432	0.065577	0	0	0.12645	0.04423	0.03142	0.20041	0.00021	0.10516	0.02304	8.00E-05	0.0011	0.03656	0.20525	0	0.00818	0.00026	0.00023	0.00011	0	0	0.00604	0.00092	7.00E-04	0.00069	0.01103	0	0	0.00018	0.00045	5.00E-05	0.00012	0.00734	0.01922	2.00E-05	0.01355	0.00646	0.00295	6.00E-05	4.00E-05	0.00945	0.00606	0.00036	0.00197
185	HC	0.00027483	0	0	0.000871623	0	0	0	0.20444	0.06924	0.14702	0.03579	0.00178	0.05908	0.00583	0.04077	0.06191	0.02097	0.01097	0.01745	0.00522	0.00794	0.00919	0.01239	0.00952	0.00393	0.01899	0.03126	0.00077	0.00146	0.01968	0.0211	0.00352	0.00267	0.00696	0.00117	0.00166	0.0036	0.00441	0	0.01733	0.00858	0.00235	0.00591	0.0013	0.01446	0.00279	0.00073	0.00121
[truncated: 29 more columns]
